# Supplementary material for: Therapeutic potential of an anti-angiogenic multimodal biomimetic peptide in hepatocellular carcinoma
Source: PubMed Central journal article supplement (PMC5731893; doi:10.18632/oncotarget.21148), 2017-09-21
Supplement: oncotarget-08-101520-s001.pdf [file oncotarget-08-101520-s001.pdf]

# Therapeutic potential of an anti-angiogenic multimodal biomimetic peptide in hepatocellular carcinoma

## SUPPLEMENTARY MATERIALS

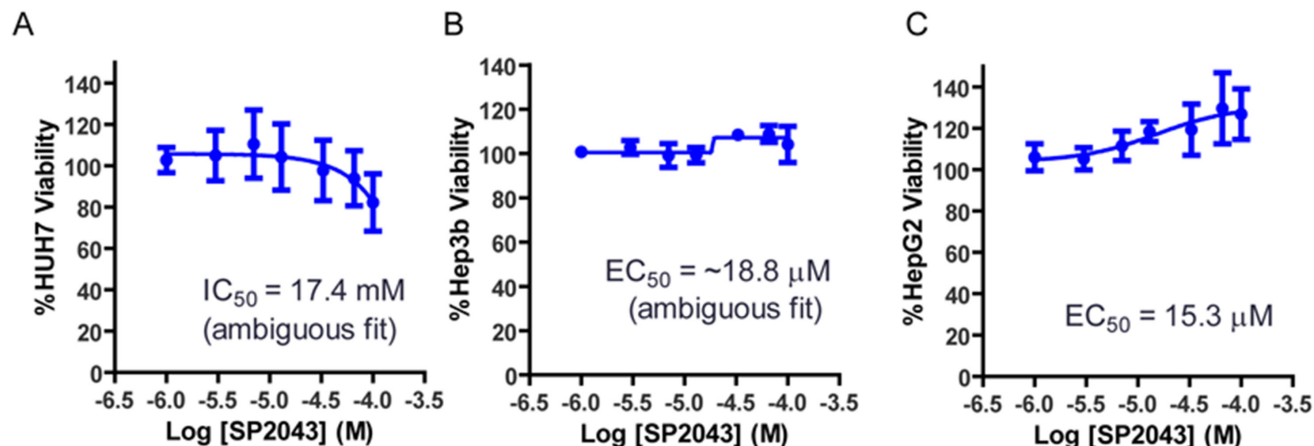

**Supplementary Figure 1: Effect of AXT050 on liver cancer cell proliferation.** (A-C) AXT050 has no significant effect on cell viability (A) HuH7, (B) Hep3b, and (C) HepG2. Data presented as mean  $\pm$  SEM; N=3.

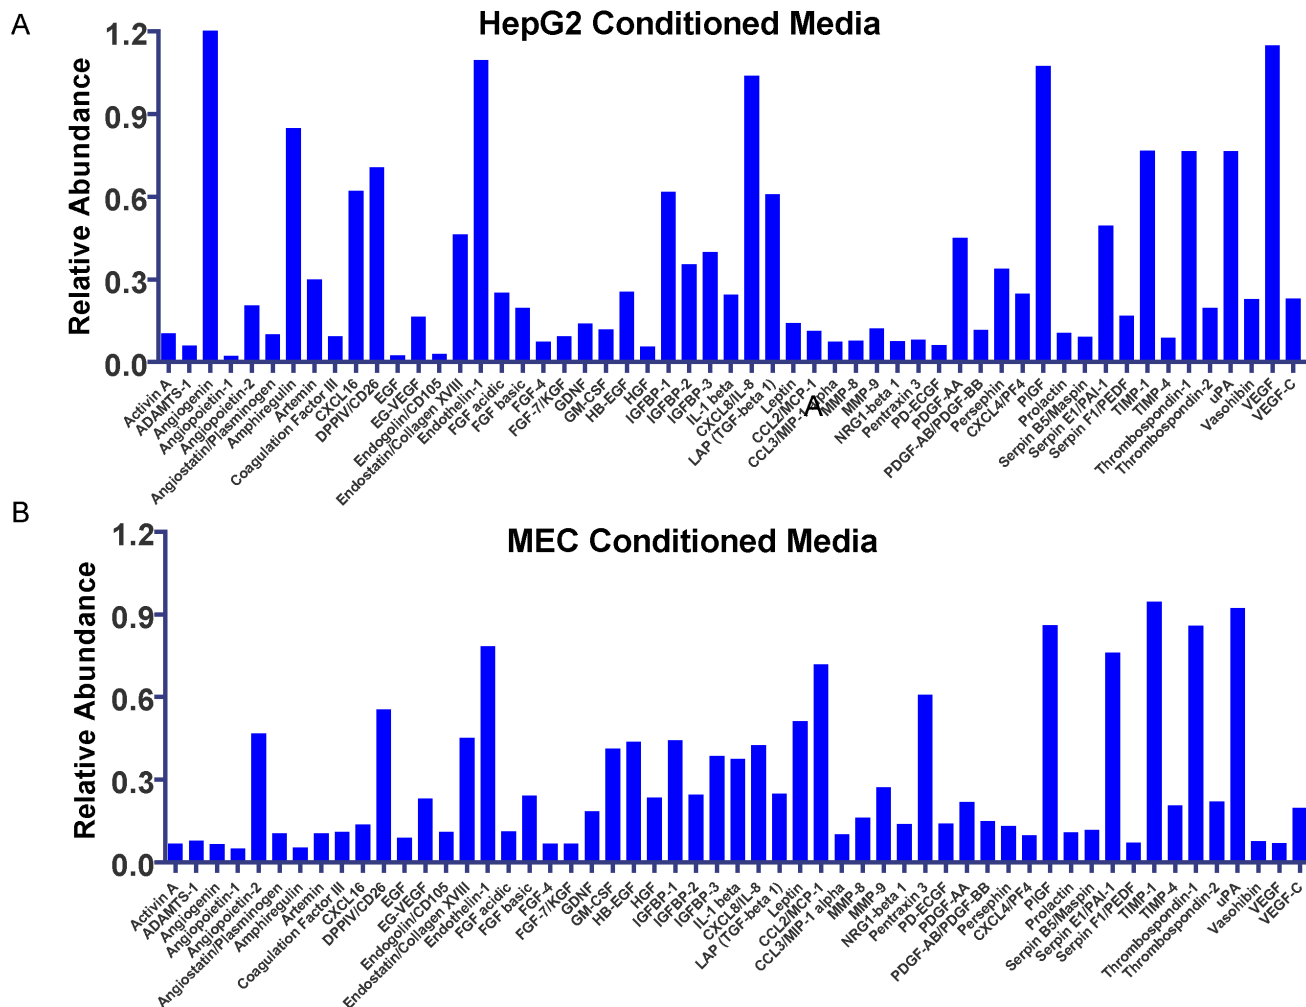

**Supplementary Figure 2: The Identification of angiogenic factors in HepG2 and MEC conditioned media. (A, B)** Quantification showing the relative abundance of angiogenic factors using antibody arrays exposed to conditioned media from (A) HepG2 or (B) MEC cells.

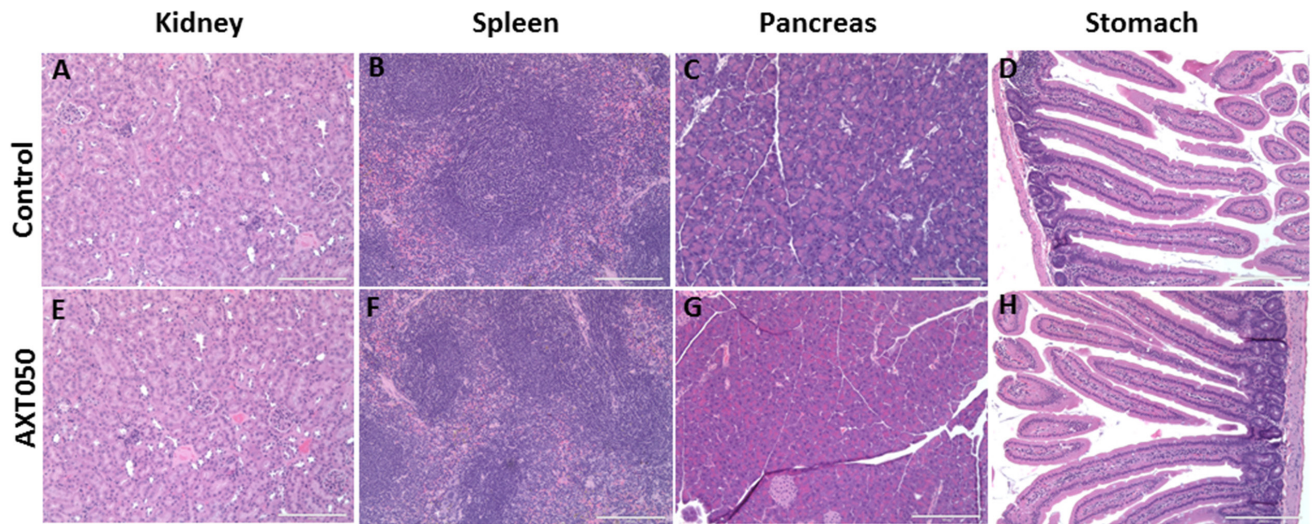

**Supplementary Figure 3: Pathological findings on different organs post necropsy showing normal tissue morphology in different organs.** Representative images of hematoxylin and eosin sections of various organs on necropsy from control (A-D) and AXT050 (E-H) treated animals. (A, E) Kidney. (B, F) Spleen. (C, G) Pancreas. (D, H) Stomach.

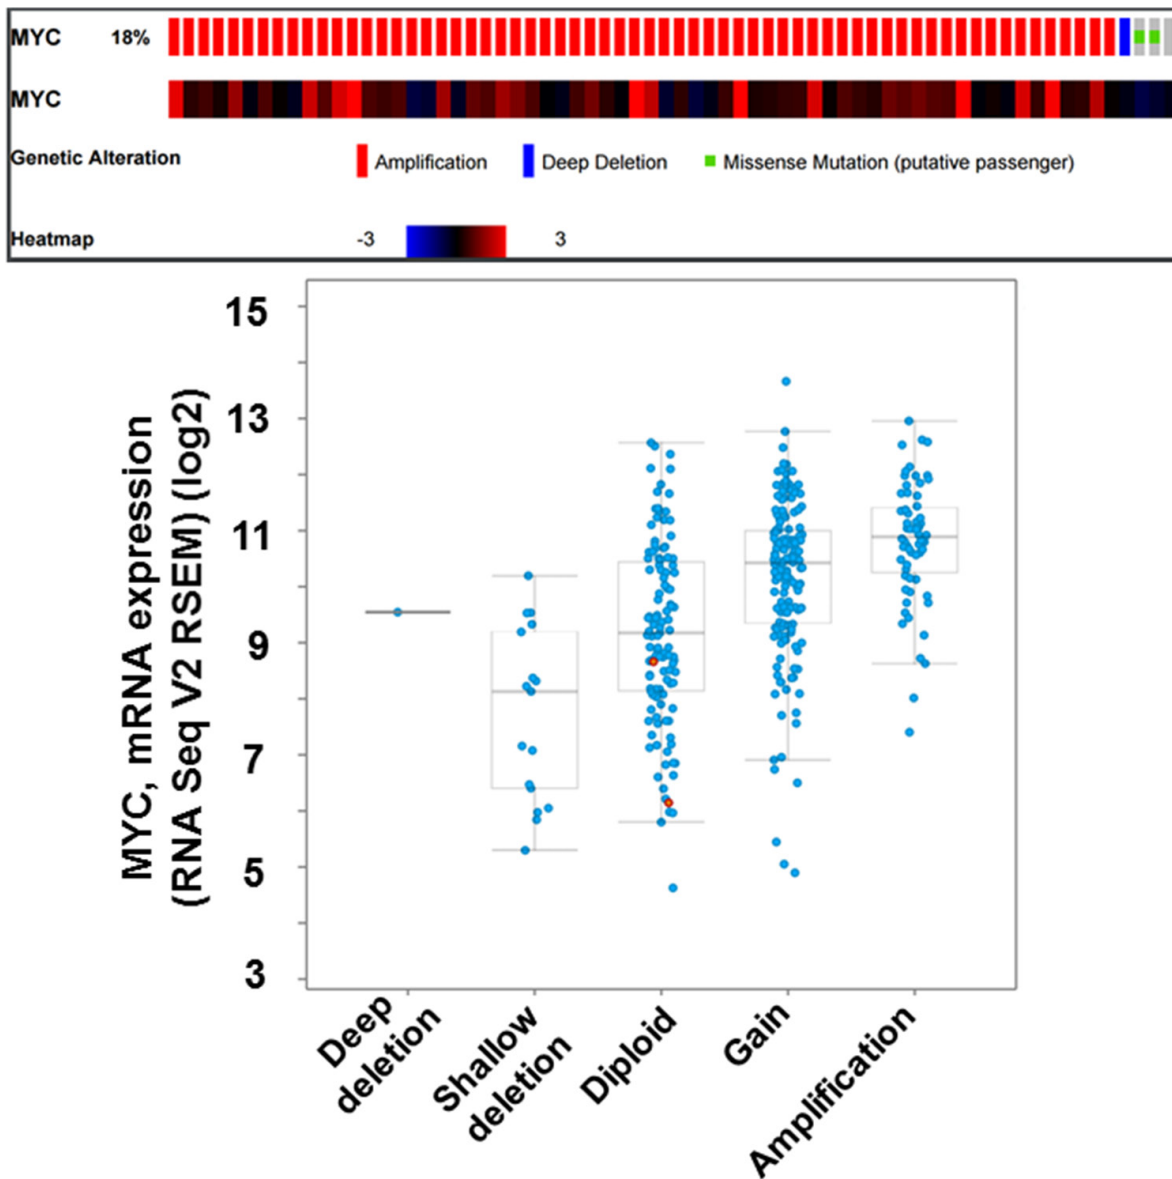

**Supplementary Figure 4: MYC gene alterations in HCC.** TCGA data analysis using c-Bioportal showing MYC over expression and corresponding gain of function genetic alterations in HCC.

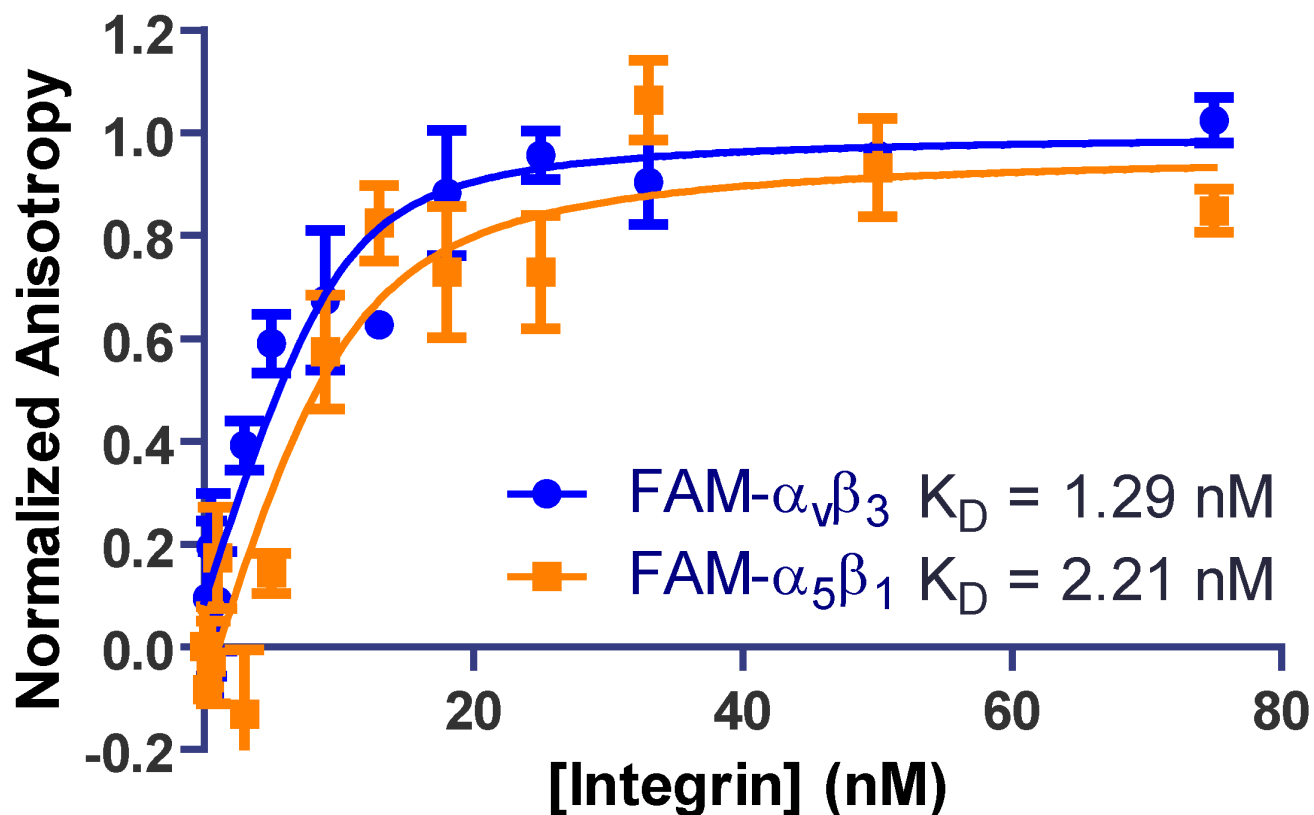

**Supplementary Figure 5: AXT050 binds  $\alpha_v\beta_3$  and  $\alpha_5\beta_1$  integrins.** The normalized change in fluorescence anisotropy for 5-FAM-labeled AXT050 (10 nM) in response to varying concentrations of recombinant  $\alpha_v\beta_3$  (blue) and  $\alpha_5\beta_1$  (orange) integrins.

A

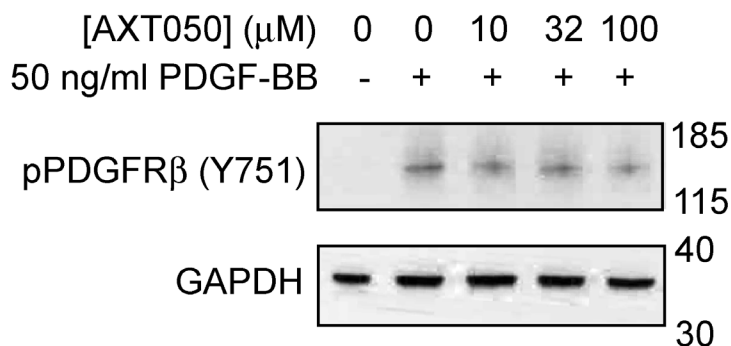

B

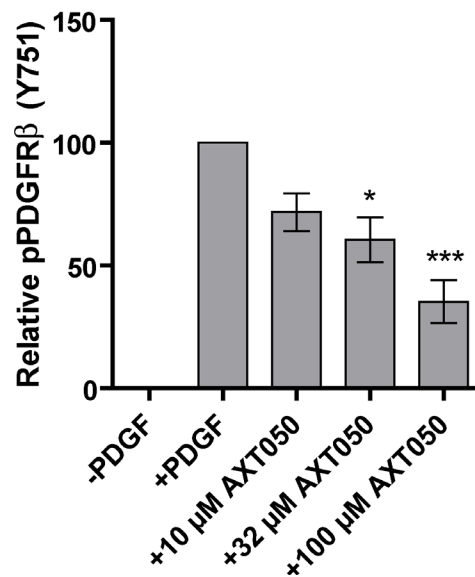

**Supplementary Figure 6: AXT050 inhibits the phosphorylation of PDGFR $\beta$ .** (A) Western blotting showing dysregulation of PDGF-BB mediated PDGFR $\beta$  signaling following treatment of 3T3 fibroblasts with AXT050. (B) Quantification of phospho-PDGFR $\beta$  western band intensities normalized to GAPDH bands. Data presented as mean  $\pm$  SEM (N=3);  $p = 0.0001$  by 1-way ANOVA. \* and \*\*\* designate significant ( $< 0.05$ ) and highly significant ( $< 0.001$ ) differences respectively by Tukey test compared to the growth factor, 0  $\mu\text{M}$  AXT050 treated samples.

LAP (liver-enriched transcriptional activator protein promoter) stimulates tTA specifically in liver 

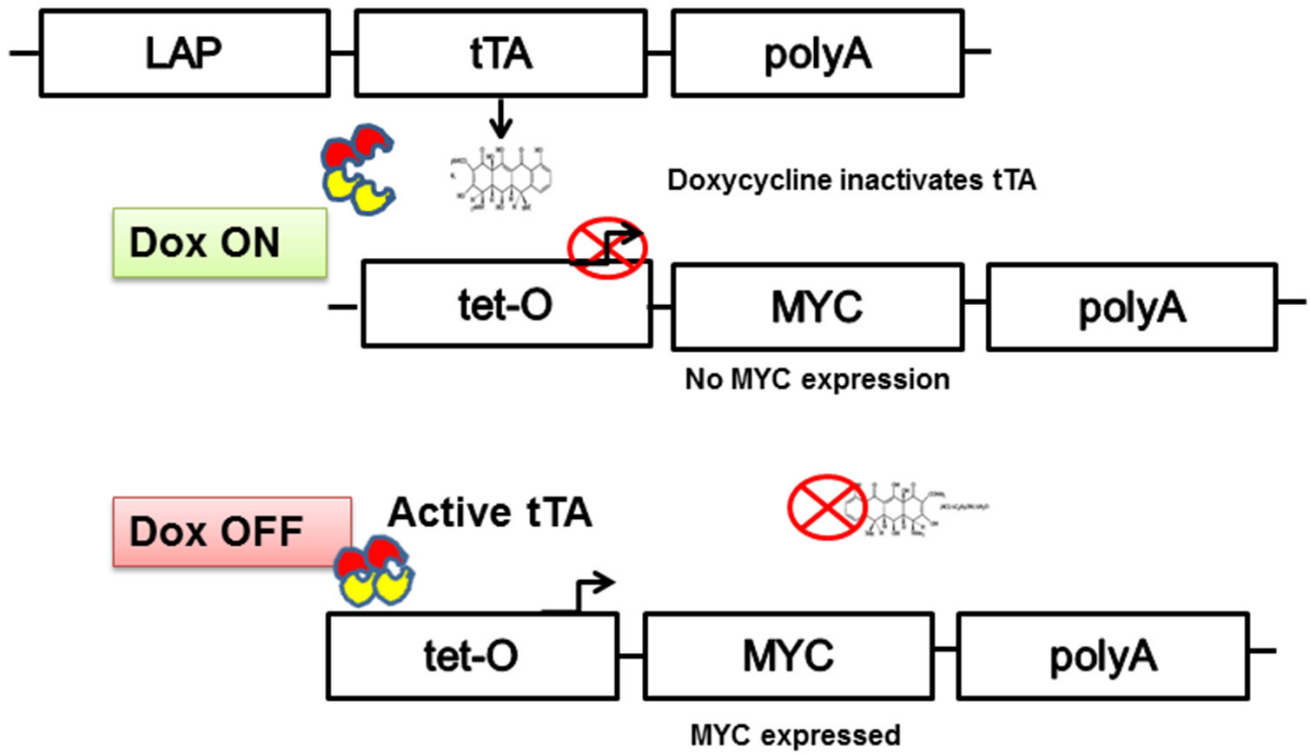

Supplementary Figure 7: Schematic of the autochthonous MYC induced liver cancer mouse model.
